# Supplementary material for: Correlation of trace contaminants to wastewater management practices in small watersheds
Source: Royal Society of Chemistry journal article supplement (doi:10.1039/c4em00583j), 2015-01-01
Supplement: c4em00583j1.pdf [file c4em00583j1.pdf]

Electronic Supplementary Information (ESI)

AUTHORS: Kathleen Schenck<sup>a</sup>, Laura Rosenblum<sup>b</sup>, Balaji Ramakrishnan<sup>b</sup>, John Carson Jr.<sup>c</sup>, Dana Macke<sup>a</sup>,  
and Christopher Nietch<sup>a</sup>

<sup>a</sup>U.S. Environmental Protection Agency, Cincinnati, Ohio 45268

<sup>b</sup>CBI Federal Services, Cincinnati, Ohio 45268

<sup>c</sup>CBI Federal Services, Findley, Ohio 45840

MANUSCRIPT TITLE: Correlation of Trace Contaminants to Waste Management Practices in Small  
Watersheds

Total number of pages: 5

Number of tables: 6

Table S1. Water quality parameters.

| Stream | Measurement | Temperature <sup>a</sup><br>(°C) | Specific<br>Conductivity<br>(µS/cm) | Dissolved<br>Oxygen<br>(mg/L) | pH   | Turbidity<br>(NTU) |
|--------|-------------|----------------------------------|-------------------------------------|-------------------------------|------|--------------------|
| TBS    | Maximum     | 19.6                             | 631                                 | 13.7                          | 8.15 | 47.9               |
|        | Minimum     | -0.2                             | 154                                 | 3.0                           | 7.62 | 4.1                |
|        | Median      | 9.7                              | 305                                 | 10.4                          | 7.84 | 17.8               |
| UHL    | Maximum     | 23.5                             | 2643                                | 18.3                          | 8.30 | 256.8              |
|        | Minimum     | 1.2                              | 652                                 | 3.4                           | 6.54 | 1.8                |
|        | Median      | 12.0                             | 1326                                | 10.9                          | 7.81 | 9.3                |
| SLT    | Maximum     | 22.5                             | 1869                                | 15.0                          | 8.28 | 54.1               |
|        | Minimum     | 0.0                              | 377                                 | 2.3                           | 7.13 | 3.3                |
|        | Median      | 11.0                             | 752                                 | 10.3                          | 7.82 | 10.5               |
| SHC    | Maximum     | 23.3                             | 2513                                | 16.3                          | 8.36 | 83.6               |
|        | Minimum     | 0.0                              | 569                                 | 2.5                           | 7.52 | 0.8                |
|        | Median      | 11.7                             | 758                                 | 10.3                          | 7.78 | 7.1                |
| USR    | Maximum     | 26.9                             | 4879                                | 14.4                          | 8.58 | 82.5               |
|        | Minimum     | -0.4                             | 569                                 | 7.1                           | 7.35 | 0                  |
|        | Median      | 13.0                             | 950                                 | 11.3                          | 8.21 | 2.8                |
| GRT    | Maximum     | 21.4                             | 887                                 | 14.3                          | 8.08 | 92.3               |
|        | Minimum     | -0.2                             | 337                                 | 3.1                           | 7.57 | 1.0                |
|        | Median      | 8.2                              | 596                                 | 10.2                          | 7.81 | 10.9               |
| SHA    | Maximum     | 22.3                             | 634                                 | 14.8                          | 8.83 | 47.9               |
|        | Minimum     | -0.3                             | 268                                 | 4.0                           | 7.63 | 1.1                |
|        | Median      | 11.3                             | 509                                 | 11.5                          | 7.93 | 8.8                |
| HST    | Maximum     | 20.5                             | 7172                                | 13.8                          | 9.10 | 30.1               |
|        | Minimum     | -0.2                             | 489                                 | 8.4                           | 7.40 | 0.6                |
|        | Median      | 6.9                              | 691                                 | 11.7                          | 7.82 | 7.8                |
| OWT    | Maximum     | 21.7                             | 807                                 | 13.6                          | 8.32 | 30.0               |
|        | Minimum     | -0.1                             | 225                                 | 4.3                           | 7.54 | 3.3                |
|        | Median      | 8.2                              | 554                                 | 10.6                          | 7.95 | 10.5               |
| NWT    | Maximum     | 21.8                             | 843                                 | 13.7                          | 8.22 | 61.4               |
|        | Minimum     | -0.3                             | 232                                 | 4.0                           | 7.60 | 5.7                |
|        | Median      | 8.3                              | 547                                 | 10.3                          | 7.89 | 17.7               |

<sup>a</sup> Differences in temperatures between sites reflect that samples were typically collected in the same order between 7:30 AM and 5PM. On two sampling days the order of collection was changed and no difference in patterns of contaminants was observed.

Sampling occurred on the following dates: 4/22/13, 4/29/13, 5/13/13, 6/03/13, 6/24/13, 7/15/13, 8/05/13, 8/26/13, 9/16/13, 10/28/13, 11/04/13, 11/18/13, 12/09/13, 12/16/13, 1/22/14, 2/03/14, 2/18/14, 2/25/14, 3/24/14, and 3/31/14.

Method 1 for the determination of sucralose and sulfamethoxazole.

Table S2. Method 1 Loading pump mobile phase gradient.

| <b>Time (min)</b> | <b>A% (water)</b> | <b>B%<br/>(0.02% formic<br/>acid in water)</b> | <b>C%<br/>(acetonitrile)</b> | <b>Flow ml/min</b> |
|-------------------|-------------------|------------------------------------------------|------------------------------|--------------------|
| 0                 | 100               | 0                                              | 0                            | 1                  |
| 1                 | 100               | 0                                              | 0                            | 1                  |
| 1.5               | 0                 | 50                                             | 50                           | 0.1                |
| 4                 | 0                 | 50                                             | 50                           | 0.1                |
| 5                 | 0                 | 0                                              | 100                          | 0.1                |
| 8                 | 0                 | 0                                              | 100                          | 0.1                |
| 9                 | 100               | 0                                              | 0                            | 0.1                |

Table S3. Method 1 Chromatographic pump mobile phase gradient.

| <b>Time<br/>(min)</b> | <b>A% (water)</b> | <b>B%<br/>(0.02%<br/>formic acid<br/>in water)</b> | <b>C%<br/>(acetonitrile)</b> | <b>%D<br/>(0.02%<br/>formic acid<br/>in methanol)</b> | <b>Flow<br/>ml/min</b> |
|-----------------------|-------------------|----------------------------------------------------|------------------------------|-------------------------------------------------------|------------------------|
| 0                     | 55                | 15                                                 | 30                           | 0                                                     | 0.30                   |
| 3                     | 50                | 5                                                  | 35                           | 10                                                    | 0.30                   |
| 12                    | 10                | 5                                                  | 75                           | 10                                                    | 0.30                   |
| 14                    | 5                 | 15                                                 | 80                           | 0                                                     | 0.30                   |
| 15                    | 0                 | 5                                                  | 95                           | 0                                                     | 0.30                   |
| 18                    | 0                 | 5                                                  | 95                           | 0                                                     | 0.30                   |
| 21                    | 55                | 15                                                 | 30                           | 0                                                     | 0.3                    |
| 24                    | 55                | 15                                                 | 30                           | 0                                                     | 0.3                    |

Table S4. Method 1 MS/MS acquisition parameters

| <b>Time window<br/>(min)</b> | <b>Mode</b> | <b>Collision<br/>energy</b> | <b>S lens</b> | <b>Transition</b> |
|------------------------------|-------------|-----------------------------|---------------|-------------------|
| 5.9-6.85                     | negative    | 14                          | 90            | 395.0→359.0       |
| 5.9-6.85                     | negative    | 14                          | 90            | 399.0→361.0       |
| 5.9-6.85                     | negative    | 14                          | 90            | 401.0→365.1       |
| 6.85-8.25                    | positive    | 14                          | 73            | 254.0→156.0       |
| 6.85-8.25                    | positive    | 14                          | 73            | 254.0→188.1       |
| 6.85-8.25                    | positive    | 14                          | 73            | 258.1→192.1       |

Method 2 for the determination of testosterone, progesterone, estriol, estrone, estradiol, ethynylestradiol, triclosan, and triclocarban

Table S5. Method 2. Mobile phase gradient

| <b>Time<br/>(min)</b> | <b>A% (water)</b> | <b>B%<br/>(0.02%<br/>formic acid<br/>in water)</b> | <b>C%<br/>(acetonitrile)</b> | <b>%D<br/>(0.02%<br/>formic acid<br/>in methanol)</b> | <b>Flow<br/>ml/min</b> |
|-----------------------|-------------------|----------------------------------------------------|------------------------------|-------------------------------------------------------|------------------------|
| 0                     | 55                | 15                                                 | 30                           | 0                                                     | 0.30                   |
| 3                     | 50                | 5                                                  | 35                           | 10                                                    | 0.30                   |
| 12                    | 10                | 5                                                  | 75                           | 10                                                    | 0.30                   |
| 14                    | 5                 | 15                                                 | 80                           | 0                                                     | 0.30                   |
| 15                    | 0                 | 5                                                  | 95                           | 0                                                     | 0.30                   |
| 18                    | 0                 | 5                                                  | 95                           | 0                                                     | 0.30                   |
| 21                    | 55                | 15                                                 | 30                           | 0                                                     | 0.3                    |
| 24                    | 55                | 15                                                 | 30                           | 0                                                     | 0.3                    |

Table S6. Method 2 MS/MS acquisition parameters.

| Time window (min) | Collision energy | S lens | Scan width | Scan time | Transition    |
|-------------------|------------------|--------|------------|-----------|---------------|
| 5.6-8.0           | 24               | 93     | 0.2        | 0.2       | 289.21→97.29  |
| 5.6-8.0           | 24               | 93     | 0.2        | 0.2       | 289.21→109.11 |
| 5.6-8.0           | 24               | 93     | 0.2        | 0.2       | 292.21→97.29  |
| 8.0-10.9          | 36               | tune   | 0.2        | 0.1       | 315.18→97.00  |
| 8.0-10.9          | 36               | tune   | 0.2        | 0.1       | 315.18→109.00 |
| 8.0-10.9          | 36               | tune   | 0.2        | 0.1       | 324.2→100.00  |
| 8.0-10.9          | 17               | Tune   | 0.2        | 0.1       | 315.03→127.00 |
| 8.0-10.9          | 17               | Tune   | 0.2        | 0.1       | 315.03→162.10 |
| 8.0-10.9          | 17               | tune   | 0.2        | 0.1       | 323.03→127.00 |
| 10.9-12.0         | 35               | tune   | 0.1        | 0.1       | 522.25→171.1  |
| 10.9-12.0         | 35               | tune   | 0.1        | 0.1       | 522.25→443.2  |
| 10.9-12.0         | 35               | tune   | 0.1        | 0.1       | 525.3→446.3   |
| 12.0-14.3         | 28               | tune   | 0.1        | 0.1       | 506.25→171.1  |
| 12.0-14.3         | 28               | tune   | 0.1        | 0.1       | 506.25→442.2  |
| 12.0-14.3         | 28               | tune   | 0.1        | 0.1       | 512.25→448.3  |
| 12.0-14.3         | 28               | tune   | 0.1        | 0.1       | 530.25→171.1  |
| 12.0-14.3         | 28               | tune   | 0.1        | 0.1       | 530.25→453.2  |
| 12.0-14.3         | 28               | tune   | 0.1        | 0.1       | 532.25→453.3  |
| 14.3-15.8         | 30               | tune   | 0.1        | 0.1       | 504.25→171.1  |
| 14.3-15.8         | 30               | tune   | 0.1        | 0.1       | 504.25→425.15 |
| 14.3-15.8         | 30               | tune   | 0.1        | 0.1       | 510.25→446.2  |
| 14.3-15.8         | 30               | tune   | 0.1        | 0.1       | 522.0→171.1   |
| 14.3-15.8         | 30               | tune   | 0.2        | 0.1       | 522.0→282.1   |
| 14.3-15.8         | 30               | tune   | 0.1        | 0.1       | 531.0→171.1   |
| 15.8-19.0         | 33               | tune   | 0.1        | 0.1       | 695.2→368.2   |
| 15.8-19.0         | 33               | tune   | 0.1        | 0.1       | 695.2→461.2   |
| 15.8-19.0         | 33               | tune   | 0.2        | 0.1       | 703.2→469.2   |
| 15.8-19.0         | 33               | tune   | 0.1        | 0.1       | 709.2→475.2   |
